# Supplementary material
Source: MDPI journal article supplement (https://www.mdpi.com/2076-0752/7/2/22)
Supplement: s1 [file s1]

| Year | Month | Antiquities Looting | Armed Conflict | Regime Change |
|------|-------|---------------------|----------------|---------------|
| 2010 | 1     | 0                   | 14             | 0             |
| 2010 | 2     | 0                   | 7              | 0             |
| 2010 | 3     | 0                   | 5              | 0             |
| 2010 | 4     | 0                   | 10             | 0             |
| 2010 | 5     | 0                   | 5              | 0             |
| 2010 | 6     | 0                   | 13             | 0             |
| 2010 | 7     | 0                   | 3              | 0             |
| 2010 | 8     | 0                   | 2              | 0             |
| 2010 | 9     | 0                   | 4              | 0             |
| 2010 | 10    | 0                   | 1              | 0             |
| 2010 | 11    | 0                   | 16             | 0             |
| 2010 | 12    | 0                   | 4              | 0             |
| 2011 | 1     | 4                   | 69             | 0             |
| 2011 | 2     | 4                   | 110            | 1             |
| 2011 | 3     | 19                  | 21             | 0             |
| 2011 | 4     | 0                   | 8              | 0             |
| 2011 | 5     | 0                   | 14             | 0             |
| 2011 | 6     | 1                   | 10             | 0             |
| 2011 | 7     | 1                   | 23             | 0             |
| 2011 | 8     | 1                   | 15             | 0             |
| 2011 | 9     | 1                   | 13             | 0             |
| 2011 | 10    | 1                   | 16             | 0             |
| 2011 | 11    | 1                   | 23             | 0             |
| 2011 | 12    | 1                   | 14             | 0             |
| 2012 | 1     | 1                   | 20             | 0             |
| 2012 | 2     | 0                   | 27             | 0             |
| 2012 | 3     | 0                   | 3              | 0             |
| 2012 | 4     | 1                   | 12             | 0             |
| 2012 | 5     | 0                   | 24             | 0             |
| 2012 | 6     | 0                   | 33             | 0             |
| 2012 | 7     | 0                   | 27             | 0             |
| 2012 | 8     | 0                   | 43             | 1             |
| 2012 | 9     | 0                   | 29             | 0             |
| 2012 | 10    | 0                   | 37             | 0             |
| 2012 | 11    | 0                   | 84             | 0             |
| 2012 | 12    | 0                   | 83             | 0             |
| 2013 | 1     | 0                   | 86             | 0             |
| 2013 | 2     | 1                   | 153            | 0             |
| 2013 | 3     | 0                   | 217            | 0             |
| 2013 | 4     | 1                   | 107            | 0             |
| 2013 | 5     | 14                  | 106            | 0             |
| 2013 | 6     | 31                  | 179            | 0             |
| 2013 | 7     | 0                   | 468            | 1             |
| 2013 | 8     | 2                   | 387            | 0             |
| 2013 | 9     | 0                   | 271            | 0             |
| 2013 | 10    | 0                   | 263            | 0             |

|      |    |   |     |   |
|------|----|---|-----|---|
| 2013 | 11 | 0 | 270 | 0 |
| 2013 | 12 | 0 | 213 | 0 |
| 2014 | 1  | 0 | 305 | 0 |
| 2014 | 2  | 0 | 136 | 0 |
| 2014 | 3  | 0 | 180 | 0 |
| 2014 | 4  | 1 | 187 | 0 |
| 2014 | 5  | 0 | 126 | 0 |
| 2014 | 6  | 0 | 91  | 0 |
| 2014 | 7  | 0 | 97  | 0 |
| 2014 | 8  | 0 | 152 | 0 |
| 2014 | 9  | 0 | 116 | 0 |
| 2014 | 10 | 0 | 140 | 0 |
| 2014 | 11 | 0 | 193 | 0 |
| 2014 | 12 | 0 | 106 | 0 |
