# Supplementary material
Source: MDPI journal article supplement (https://www.mdpi.com/2076-0752/7/2/22)
Supplement: s1 [file s1]

| Year | Quarter | Antiquities Looting | Armed Conflict | Regime Change |
|------|---------|---------------------|----------------|---------------|
| 1997 | 1       | 0                   | 12             | 0             |
| 1997 | 2       | 0                   | 6              | 0             |
| 1997 | 3       | 0                   | 14             | 0             |
| 1997 | 4       | 0                   | 8              | 0             |
| 1998 | 1       | 0                   | 6              | 0             |
| 1998 | 2       | 0                   | 2              | 0             |
| 1998 | 3       | 0                   | 4              | 0             |
| 1998 | 4       | 0                   | 1              | 0             |
| 1999 | 1       | 0                   | 1              | 0             |
| 1999 | 2       | 1                   | 2              | 0             |
| 1999 | 3       | 0                   | 3              | 0             |
| 1999 | 4       | 0                   | 3              | 0             |
| 2000 | 1       | 0                   | 3              | 0             |
| 2000 | 2       | 0                   | 6              | 0             |
| 2000 | 3       | 0                   | 0              | 0             |
| 2000 | 4       | 0                   | 17             | 0             |
| 2001 | 1       | 0                   | 3              | 0             |
| 2001 | 2       | 0                   | 8              | 0             |
| 2001 | 3       | 0                   | 2              | 0             |
| 2001 | 4       | 1                   | 3              | 0             |
| 2002 | 1       | 0                   | 11             | 0             |
| 2002 | 2       | 1                   | 11             | 0             |
| 2002 | 3       | 0                   | 1              | 0             |
| 2002 | 4       | 0                   | 1              | 0             |
| 2003 | 1       | 0                   | 2              | 0             |
| 2003 | 2       | 1                   | 3              | 0             |
| 2003 | 3       | 0                   | 4              | 0             |
| 2003 | 4       | 0                   | 5              | 0             |
| 2004 | 1       | 0                   | 0              | 0             |
| 2004 | 2       | 0                   | 5              | 0             |
| 2004 | 3       | 0                   | 3              | 0             |
| 2004 | 4       | 0                   | 2              | 0             |
| 2005 | 1       | 0                   | 11             | 1             |
| 2005 | 2       | 0                   | 22             | 0             |
| 2005 | 3       | 0                   | 4              | 0             |
| 2005 | 4       | 0                   | 25             | 0             |
| 2006 | 1       | 0                   | 3              | 0             |
| 2006 | 2       | 0                   | 11             | 0             |
| 2006 | 3       | 0                   | 1              | 0             |
| 2006 | 4       | 0                   | 3              | 0             |
| 2007 | 1       | 0                   | 5              | 0             |
| 2007 | 2       | 0                   | 16             | 0             |
| 2007 | 3       | 0                   | 7              | 0             |
| 2007 | 4       | 0                   | 7              | 0             |
| 2008 | 1       | 0                   | 25             | 0             |
| 2008 | 2       | 0                   | 13             | 0             |

|      |   |    |      |   |
|------|---|----|------|---|
| 2008 | 3 | 0  | 9    | 0 |
| 2008 | 4 | 0  | 26   | 0 |
| 2009 | 1 | 0  | 8    | 0 |
| 2009 | 2 | 0  | 9    | 0 |
| 2009 | 3 | 0  | 5    | 0 |
| 2009 | 4 | 0  | 9    | 0 |
| 2010 | 1 | 0  | 26   | 0 |
| 2010 | 2 | 0  | 28   | 0 |
| 2010 | 3 | 0  | 9    | 0 |
| 2010 | 4 | 0  | 21   | 0 |
| 2011 | 1 | 27 | 200  | 1 |
| 2011 | 2 | 1  | 32   | 0 |
| 2011 | 3 | 3  | 51   | 0 |
| 2011 | 4 | 3  | 53   | 0 |
| 2012 | 1 | 1  | 50   | 0 |
| 2012 | 2 | 1  | 69   | 0 |
| 2012 | 3 | 0  | 99   | 1 |
| 2012 | 4 | 0  | 204  | 0 |
| 2013 | 1 | 1  | 456  | 0 |
| 2013 | 2 | 46 | 392  | 0 |
| 2013 | 3 | 2  | 1126 | 1 |
| 2013 | 4 | 0  | 746  | 0 |
| 2014 | 1 | 0  | 621  | 0 |
| 2014 | 2 | 1  | 404  | 0 |
| 2014 | 3 | 0  | 365  | 0 |
| 2014 | 4 | 0  | 439  | 0 |
